# Supplementary material for: Clay based materials for storage and therapeutic release of nitric oxide
Source: Royal Society of Chemistry journal article supplement (doi:10.1039/c3tb20535e), 2013-01-01
Supplement: c3tb20535e.pdf [file c3tb20535e.pdf]

## **Clay based materials for storage and therapeutic release of nitric oxide**

*Ana C. Fernandes; Moisés L. Pinto; Fernando Antunes, João Pires*

CQB and Department of Chemistry and Biochemistry, Faculty of Sciences, Building C8, University of

Lisbon, Campo Grande, 1749-016 Lisbon, Portugal

Telephone: (351) 217500898 – Fax: (351) 217500088 – Email: acfernandes@fc.ul.pt

### **Supplementary Information**

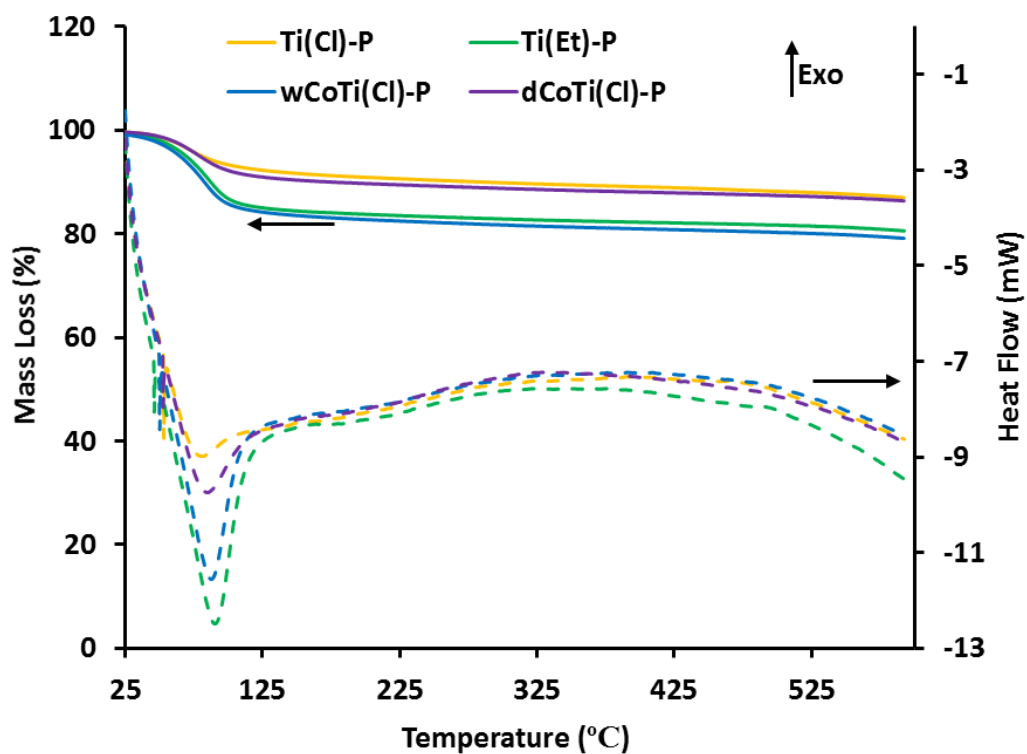

Fig. S1 TG (solid lines) and DSC (broken lines) curves for the titanium oxide pillared materials.

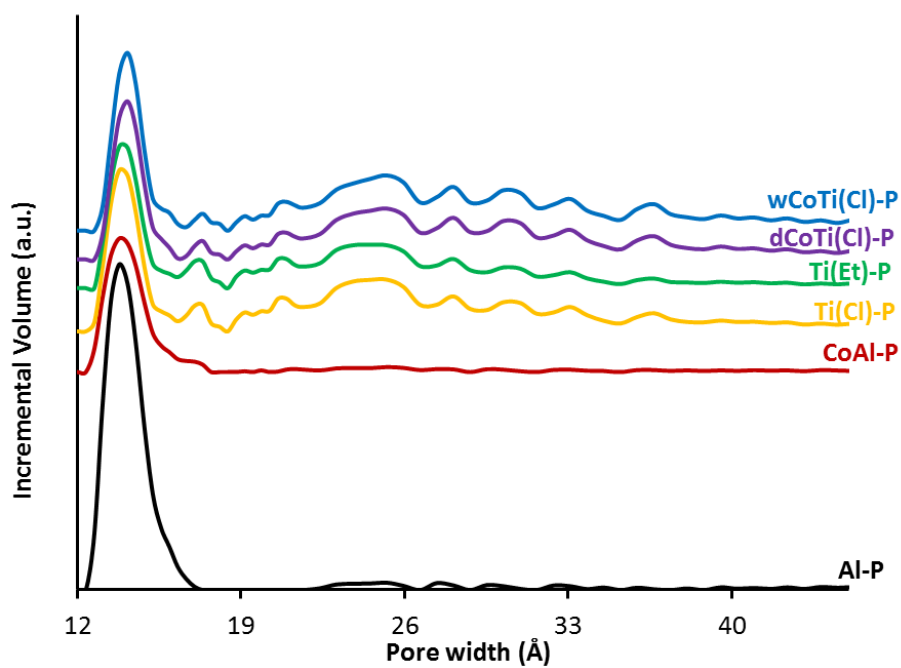

**Fig. S2 Pore-size distribution.**

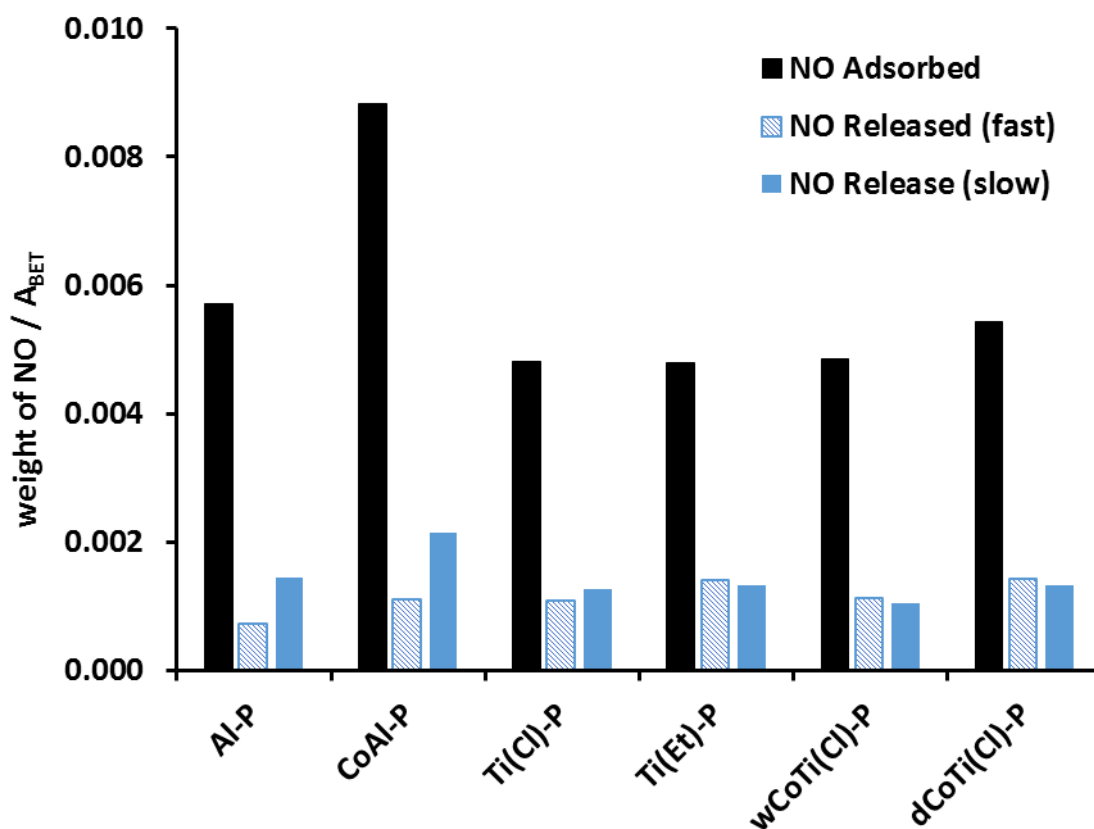

**Fig. S3** Weight of NO adsorbed and released, expressed by unit of surface area; (fast) stands for the amount that corresponds to the initial step decrease, and (slow) to the remaining released amount as show in Figure 5

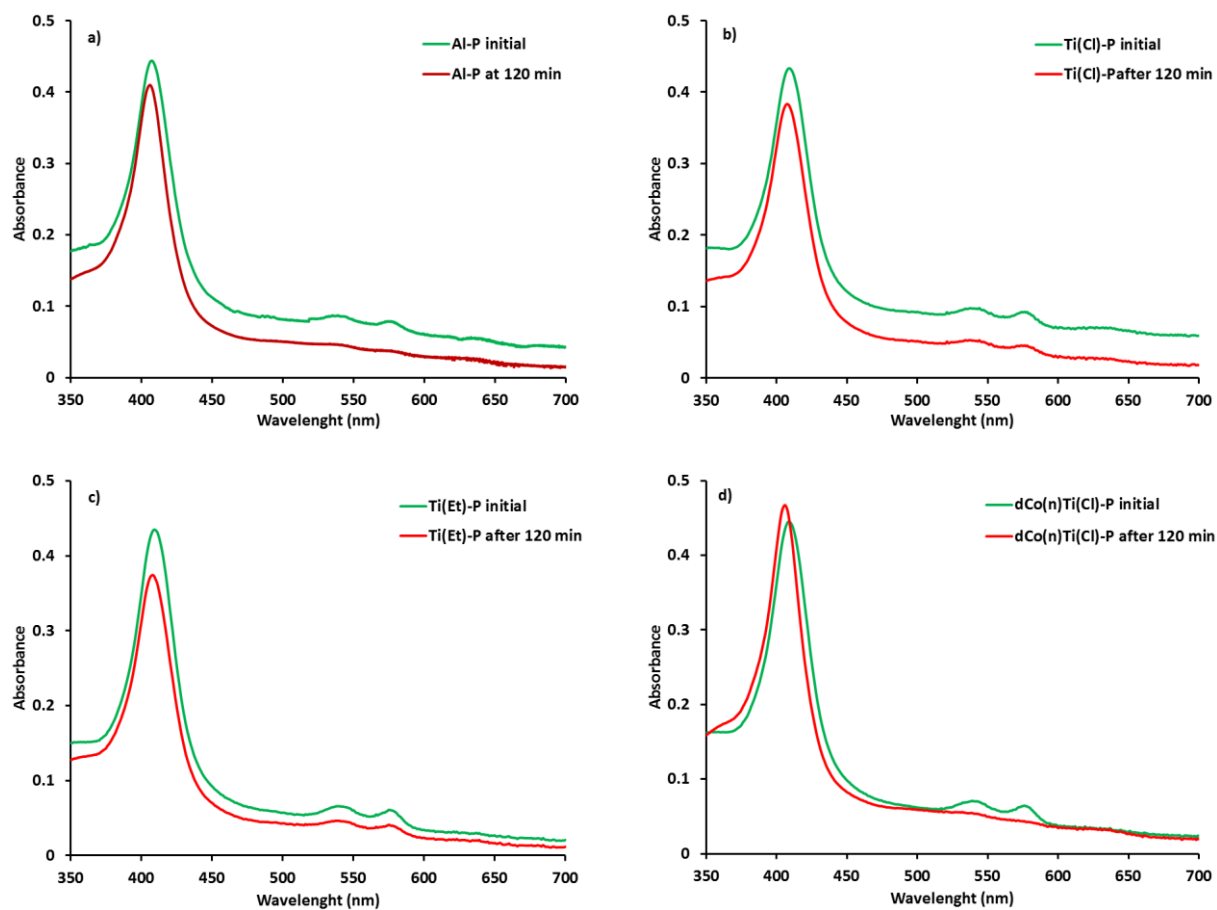

**Fig S4 UV spectra for the transformation of oxyhemoglobin in methemoglobin due to NO release.**
